# Supplementary material for: Exome sequencing identifies a novel mutation in GJA8 associated with inherited cataract in a Chinese family
Source: Springer Nature journal article supplement (doi:10.1007/s00417-016-3513-9), 2016-10-26
Supplement: MOESM1 [file 10985844]

## Sheet: Sheet1
Data statistics of exon sequcing of III:3 and III:5
Sample	BAIT_SET	GENOME_SIZE	TARGET_TERRITORY	TOTAL_READS	# Reads	PF_UNIQUE_READS	PCT_PF_UQ_READS	PF_UQ_READS_ALIGNED	PCT_PF_UQ_READS_ALIGNED	ON_BAIT_BASES	NEAR_BAIT_BASES	OFF_BAIT_BASES	PCT_SELECTED_BASES	PCT_OFF_BAIT	MEAN_TARGET_COVERAGE	PCT_USABLE_BASES_ON_TARGET	FOLD_ENRICHMENT	ZERO_CVG_TARGETS_PCT	FOLD_80_BASE_PENALTY	PCT_TARGET_BASES_2X	PCT_TARGET_BASES_10X	PCT_TARGET_BASES_20X	PCT_TARGET_BASES_30X	AT_DROPOUT	GC_DROPOUT
III:3	Illumina_Bait	3095693983	62286318	35000000	35000000	35000000	1	31259860	0.893139	1632393869	641595810	845685819	0.728919	0.271081	26.2079	0.466398	26.0064	0.009996	2.93017	0.922868	0.778296	0.566167	0.360687	0.031662	15.8189
III:5	Illumina_Bait	3095693983	62286318	35000000	35000000	35000000	1	31161828	0.890338	1568712253	673881918	868576118	0.72082	0.27918	25.1855	0.448204	25.0602	0.010742	2.81822	0.93232	0.78691	0.550069	0.321932	0.000327	14.6474
Read me:
1. BAIT_SET: The name of the bait set used in the hybrid selection.
2. GENOME_SIZE: The number of bases in the reference genome used for alignment.
3. BAIT_TERRITORY: The number of bases which have one or more baits on top of them.
4. TARGET_TERRITORY: The unique number of target bases in the experiment where target is usually exons etc.
5. BAIT_DESIGN_EFFICIENCY: Target terrirtoy / bait territory. 1 == perfectly efficient, 0.5 = half of baited bases are not target.
6. TOTAL_READS: The total number of reads in the SAM or BAM file examine.
7. PF_READS: The number of reads that pass the vendor's filter.
8. PF_UNIQUE_READS: The number of PF reads that are not marked as duplicates.
9. PCT_PF_READS: PF reads / total reads. The percent of reads passing filter.
10. PCT_PF_UQ_READS: PF Unique Reads / Total Reads.
11. PF_UQ_READS_ALIGNED: The number of PF unique reads that are aligned with mapping score > 0 to the reference genome.
12. PCT_PF_UQ_READS_ALIGNED: PF Reads Aligned / PF Reads.
13. PF_UQ_BASES_ALIGNED: The number of bases in the PF aligned reads that are mapped to a reference base. Accounts for clipping and gaps.
14. ON_BAIT_BASES: The number of PF aligned bases that mapped to a baited region of the genome.
15. NEAR_BAIT_BASES: The number of PF aligned bases that mapped to within a fixed interval of a baited region, but not on a baited region.
16. OFF_BAIT_BASES: The number of PF aligned bases that mapped to neither on or near a bait.
17. ON_TARGET_BASES: The number of PF aligned bases that mapped to a targetted region of the genome.
18. PCT_SELECTED_BASES: On+Near Bait Bases / PF Bases Aligned.
19. PCT_OFF_BAIT: The percentage of aligned PF bases that mapped neither on or near a bait.
20. ON_BAIT_VS_SELECTED: The percentage of on+near bait bases that are on as opposed to near.
21. MEAN_BAIT_COVERAGE: The mean coverage of all baits in the experiment.
22. MEAN_TARGET_COVERAGE: The mean coverage of targets that recieved at least coverage depth = 2 at one base.
23. PCT_USABLE_BASES_ON_BAIT: The number of aligned, de-duped, on-bait bases out of the PF bases available.
24. PCT_USABLE_BASES_ON_TARGET: The number of aligned, de-duped, on-target bases out of the PF bases available.
25. FOLD_ENRICHMENT: The fold by which the baited region has been amplified above genomic background.
26. ZERO_CVG_TARGETS_PCT: The number of targets that did not reach coverage=2 over any base.
27. FOLD_80_BASE_PENALTY: The fold over-coverage necessary to raise 80% of bases in "non-zero-cvg" targets to the mean coverage level in those targets.
28. PCT_TARGET_BASES_2X: The percentage of ALL target bases acheiving 2X or greater coverage.
29. PCT_TARGET_BASES_10X: The percentage of ALL target bases acheiving 10X or greater coverage.
30. PCT_TARGET_BASES_20X: The percentage of ALL target bases acheiving 20X or greater coverage.
31. PCT_TARGET_BASES_30X: The percentage of ALL target bases acheiving 30X or greater coverage.
32. HS_LIBRARY_SIZE: The estimated number of unique molecules in the selected part of the library.
33. HS_PENALTY_10X: The "hybrid selection penalty" incurred to get 80% of target bases to 10X. This metric should be interpreted as: if I have a design with 10 megabases of target, and want to get 10X coverage I need to sequence until PF_ALIGNED_BASES = 10^6 * 10 * HS_PENALTY_10X.
34. HS_PENALTY_20X: The "hybrid selection penalty" incurred to get 80% of target bases to 20X. This metric should be interpreted as: if I have a design with 10 megabases of target, and want to get 20X coverage I need to sequence until PF_ALIGNED_BASES = 10^6 * 20 * HS_PENALTY_20X.
35. HS_PENALTY_30X: The "hybrid selection penalty" incurred to get 80% of target bases to 30X. This metric should be interpreted as: if I have a design with 10 megabases of target, and want to get 30X coverage I need to sequence until PF_ALIGNED_BASES = 10^6 * 30 * HS_PENALTY_30X.
